# Supplementary material
Source: PubMed Central journal article supplement (PMC9178706)
Supplement: NIHMS1787853-supplement-Supplementary_Information.pdf [file NIHMS1787853-supplement-Supplementary_Information.pdf]

## Supplementary information

### Supplementary Data 1– All CRE coordinates (Provided as a separate excel file)

This Excel spreadsheet provides a list of cis-regulatory elements mapped in this study. The column headers are as below:

| Header       | Description                  |
|--------------|------------------------------|
| name         | peak name                    |
| seqnames     | chromosome                   |
| start        | start                        |
| end          | end                          |
| width        | peak width                   |
| peaks        | peak name                    |
| TS           | log2(Tinaja/Surface)         |
| TS.q         | adj P-Value                  |
| PS           | log2(Pachon/Surface)         |
| PS.q         | adj P-Value                  |
| PT           | log2(Pachon/Tinaja)          |
| PT.q         | adj P-Value                  |
| A            | geometric mean of signal     |
| nearest.gene | Nearest Gene                 |
|              | distance to TSS of nearest   |
| dist.tss     | gene                         |
| s            | 1 = peak in Surface, 0 = not |
| p            | 1 = peak in Pachon, 0 = not  |
| t            | 1 = peak in Tinaja, 0 = not  |
| h3k4me3.s    | H3K4me3 overlap in Surface   |
| h3k4me3.p    | H3K4me3 overlap in Pachon    |
| h3k4me3.t    | H3K4me3 overlap in Tinaja    |
| h3k27ac.s    | H3K27Ac overlap in Surface   |
| h3k27ac.p    | H3K27Ac overlap in Pachon    |
| h3k27ac.t    | H3K27Ac overlap in Tinaja    |
| h3k27me3.s   | H3K27me3 overlap in Surface  |
| h3k27me3.p   | H3K27me3 overlap in Pachon   |
| h3k27me3.t   | H3K27me3 overlap in Tinaja   |

### Supplementary Data 2– RNA-seq\_AstMex2 (Provided as a separate excel file)

This excel spreadsheet provides the transcriptome data. The column headers are as below:

| Header                    | Description      |
|---------------------------|------------------|
| ens_id                    | ensembl id       |
| gene                      | gene name        |
| chr                       | Chromosome no.   |
| start                     |                  |
| end                       |                  |
| Strand                    |                  |
| Biotype                   |                  |
| s_pachon_atac_1           | CPM Pachón 1     |
| s_pachon_atac_2           | CPM Pachón 2     |
| s_surface_atac_1          | CPM Surface 1    |
| s_surface_atac_2          | CPM Surface 2    |
| s_tinaja_atac_1           | CPM Tinaja 1     |
| s_tinaja_atac_2           | CPM Tinaja 1     |
| pachon_vs_surface.log2fc  | Log fold change  |
| pachon_vs_surface.log2cpm | Log CPM ratio    |
| pachon_vs_surface.pval    | P value          |
| pachon_vs_surface.padj    | Adjusted P value |
| pachon_vs_tinaja.log2fc   | Log fold change  |
| pachon_vs_tinaja.log2cpm  | Log CPM ratio    |
| pachon_vs_tinaja.pval     | P value          |
| pachon_vs_tinaja.padj     | Adjusted P value |
| tinaja_vs_surface.log2fc  | Log fold change  |
| tinaja_vs_surface.log2cpm | Log CPM ratio    |
| tinaja_vs_surface.pval    | P value          |
| tinaja_vs_surface.padj    | Adjusted P value |

### Supplementary Data 3 – Aligned S-P-CRE-*hpdb*

DNA sequence alignment for surface and Pachón CRE-Hpdb highlighting the sites that were mutated for reporter assay.

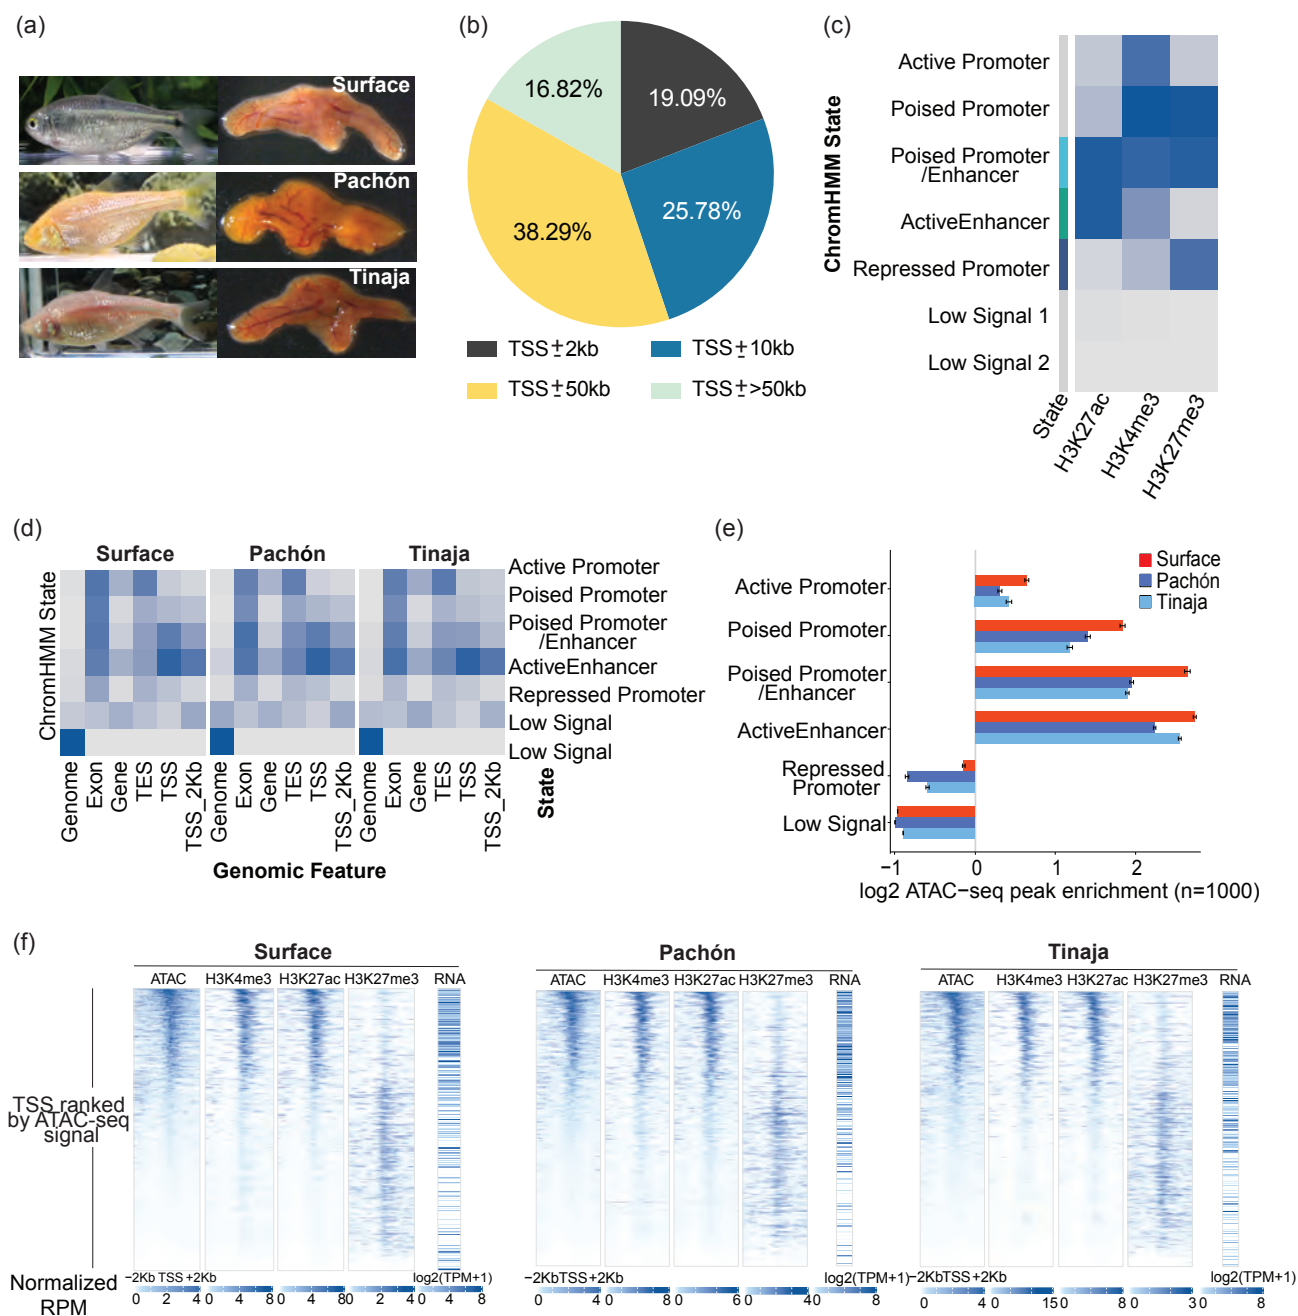

**Supplementary Figure 1:** (a) Left panel shows representative images of surface, Pachón and Tinaja fishes and right panel shows their corresponding livers. (b) Pie chart showing genomic distribution for the CREs mapped. We defined promoters as CREs within  $\pm 2\text{kb}$  of the transcription start site (TSS); Proximal CREs within  $\pm 10\text{kb}$  of TSS; Distal elements within  $\pm 50\text{kb}$  of TSS and the rest are categorized as intergenic. (c) Heatmap showing the chromatin features comprising each of the seven chromatin states into which the CREs were categorized using ChromHMM. The two low signal states belong to different genomic regions as depicted in Fig. S1d. (d) ChromHMM emission heatmap showing the distribution of various chromatin states across various features in the genome of surface, Pachón and Tinaja. (e) Enrichment of ATAC-seq peaks in the ChromHMM states. The two low signal states were combined into a single low signal state for better depiction. The x-axis shows the average enrichment ratio  $\pm$  standard deviation ( $n=1000$ ) for each ChromHMM state. (f) Heatmaps for ATAC-seq, H3K4me3, H3K27ac and H3K27me3 signal at all the promoters (TSS  $\pm 2\text{Kb}$ ) along with the corresponding RNA levels for the surface fish. Plotted are reads per million (RPM) normalized to ChIP-seq signals at promoters.

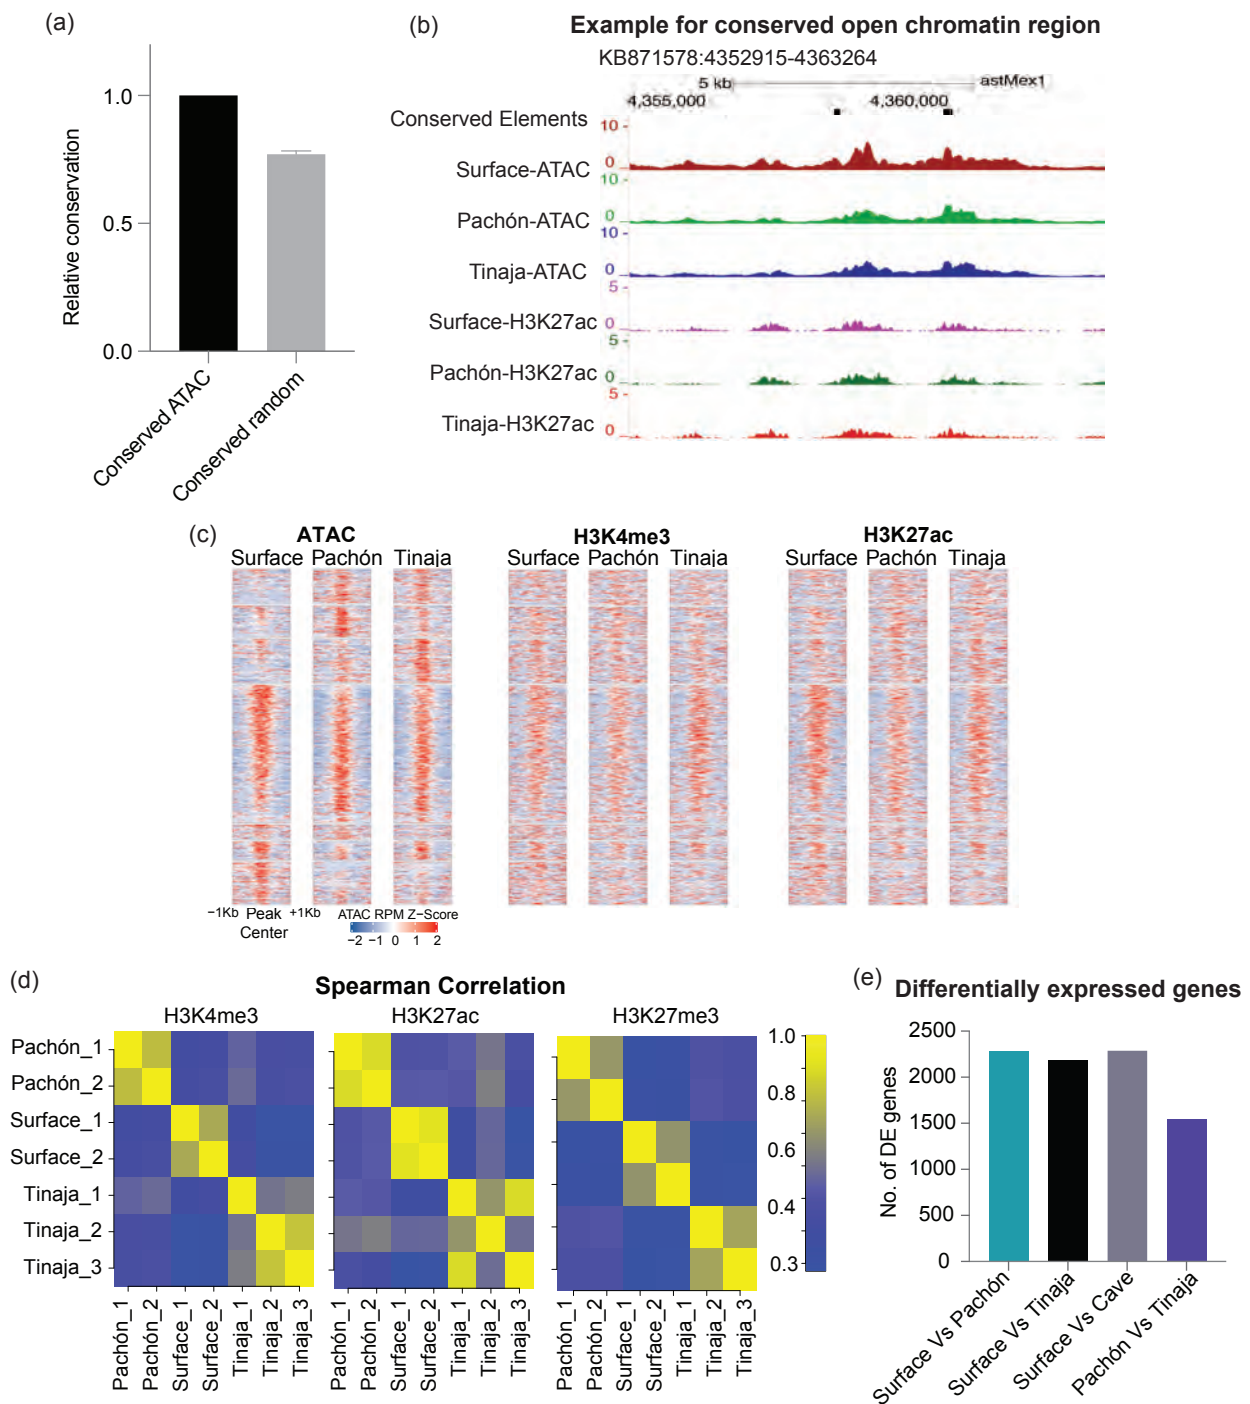

**Supplementary Figure 2:** (a) Overlap of ATAC peaks with evolutionarily conserved regions using 11-fish GERP scores normalized to 1 (Black bar). The grey bar represents average relative conservation of same number of randomly picked, non-exonic and size matched genomic regions. The standard deviation from 1000 iterations of picking random set of regions (b) Browser shot of one of the conserved candidate-CREs. (c) Heatmaps showing high correlation between ATAC-seq, H3K4me3 and H3K27ac signals in surface, Pachón and Tinaja. (d) Heatmaps for spearman correlations between different samples for each chromatin feature measured in the study – H3K4me3, H3K27ac, H3K27me3. (e) Number of differentially expressed genes between different morphotypes.

(a) Lipid metabolism network in cave-biased genes

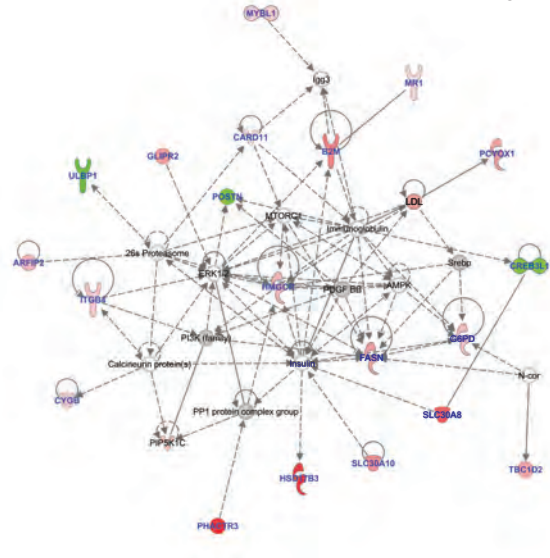

(b) HNF4a targets in carbohydrate metabolism network

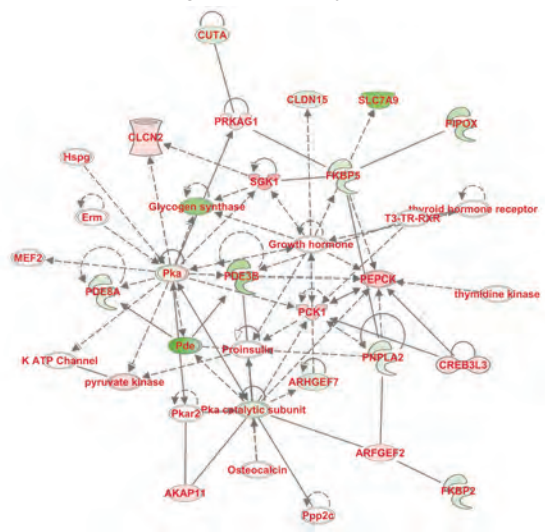

(c) HNF4a targets in lipid metabolism network

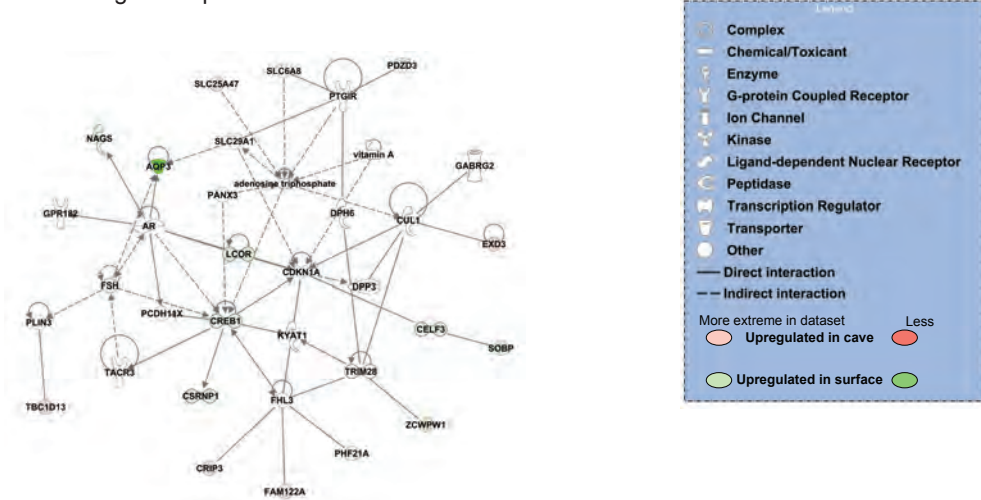

**Supplementary Figure 3:** (a) Lipid metabolism network genes are overrepresented among genes associated with c-CREs. The figure shows lipid metabolism network centered around insulin highlights multiple genes from our dataset (colored molecules) that are differentially regulated between surface and Pachón. (b) HNF4a target genes are involved in carbohydrate metabolism network. Many differentially expressed genes between surface and Pachón are direct/indirect targets of HNF4a as highlighted (colored molecules) in the network. (c) HNF4a target genes are involved in lipid metabolism network. Many differentially expressed genes between surface and Pachón are direct/indirect targets of HNF4a as highlighted (colored molecules) in the network.

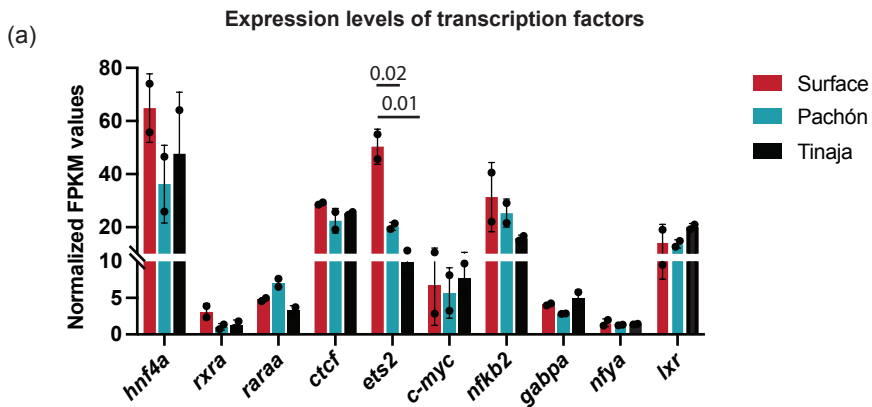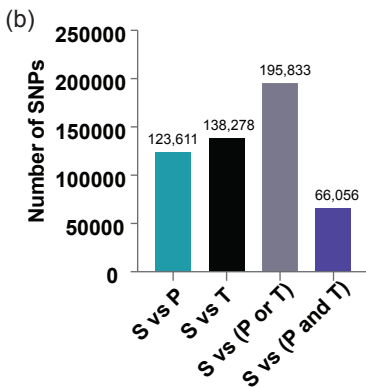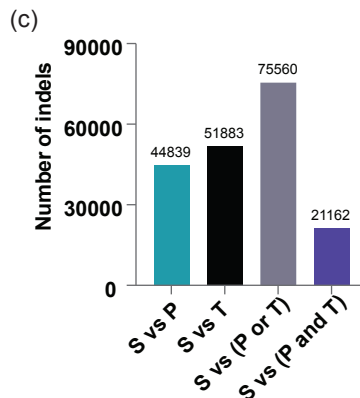

**Supplementary Figure 4:** (a) Expression levels of transcription factors represented as normalized FPKM values in each morphotype. The graph represents average values +/- s.d. from n=2 biologically independent RNA-seq experiments. p-values were calculated using two-tailed student's t-test. (b, c) No. of SNPs (b) and Indels (c) between surface and Pachón (S vs P), surface and Tinaja (S vs T), surface and either of the two cave populations (S vs (P or T)) and between surface and both the cave populations (S vs (P and T)).

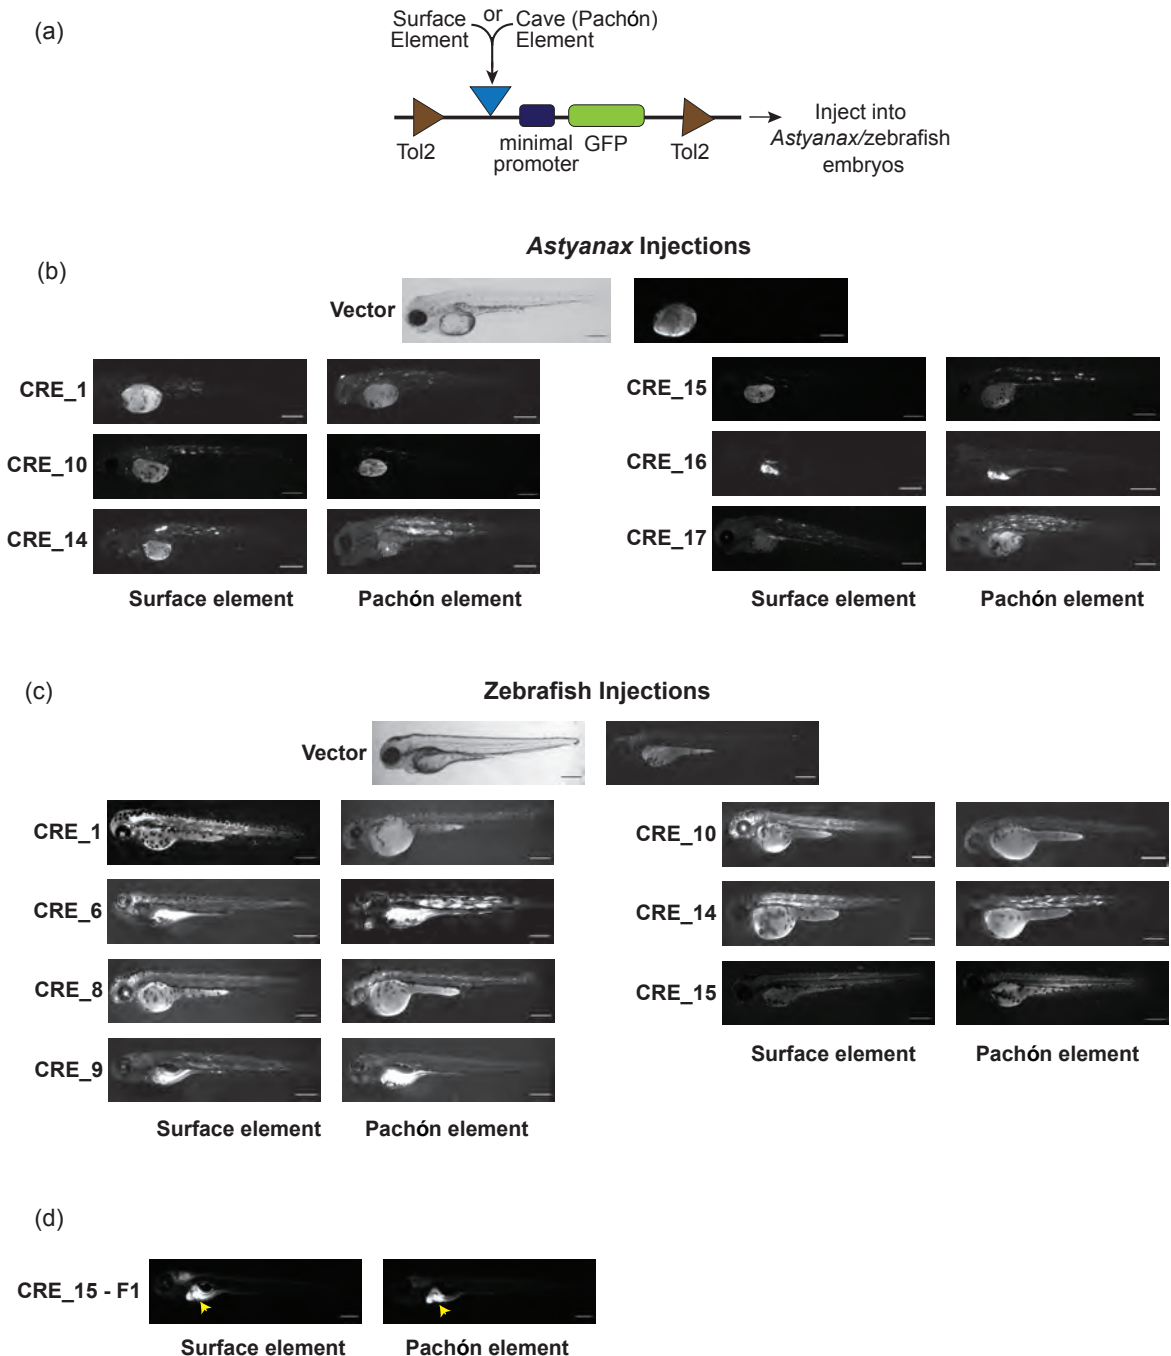

**Supplementary Figure 5:** (a) Schematic of the reporter construct used for assaying enhancer activity in *A. mexicanus* and zebrafish larvae. (b) Representative bright field image of uninjected 4 days post fertilization *A. mexicanus* surface fish larvae, injected with vector alone (Vector) and injected with surface and the Pachón alleles of candidate CREs (see methods for more details). Scale bar = 0.5 mm. (c) Representative bright field image of uninjected and injected 4 dpf zebrafish larvae with vector alone (Top panel) and 4 dpf zebrafish larvae injected with surface and the Pachón alleles of candidate CREs. (d) F1 stable zebrafish line expressing surface and Pachón CRE\_15, respectively. Reporter expression is seen in the liver/gut region (yellow arrowheads). Scale bars = 0.5 mm.

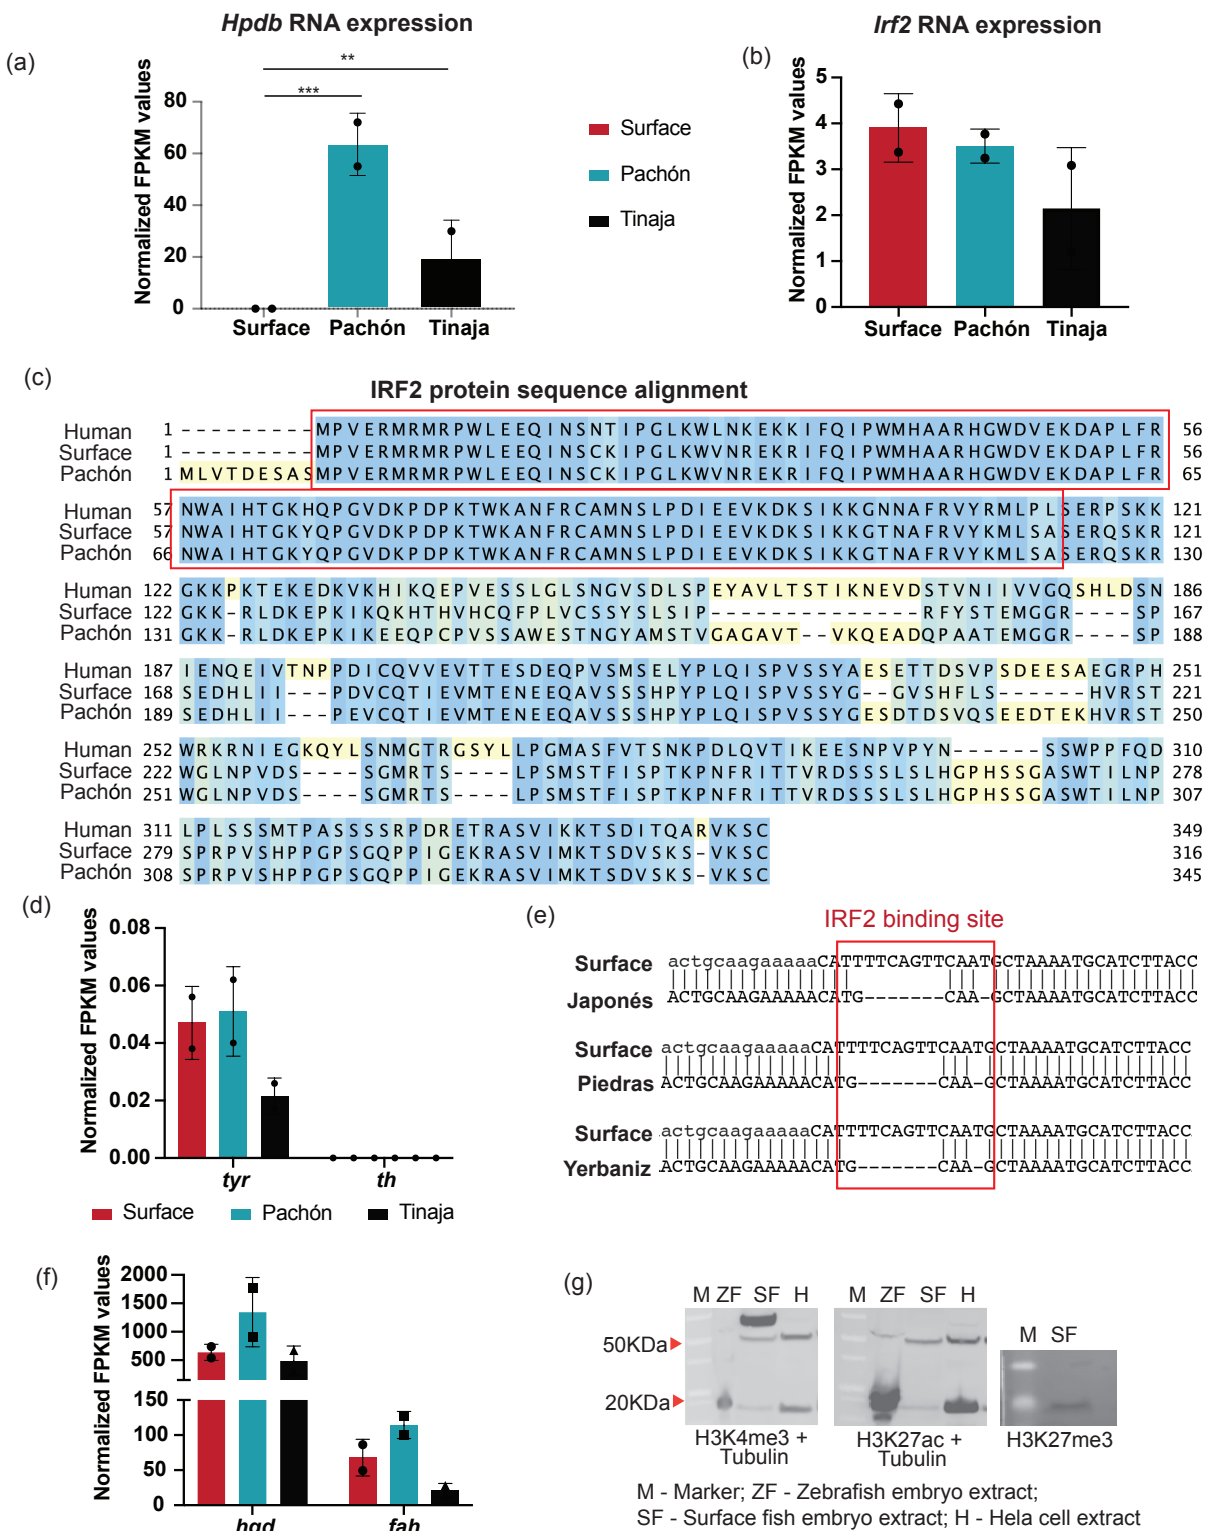

**Supplementary Figure 6:** (a) Expression levels of *hpdb* gene in surface, Pachón and Tinaja livers from RNA-seq experiment. (b) Expression levels of *Irf2* gene in the livers of adult surface, Pachón and Tinaja. (c) Alignment for human and Pachón cavefish IRF2 protein. Amino acids within the red box comprises the highly conserved DNA-binding domain of IRF2. (d) Expression levels of genes belonging to tyrosine metabolism that make melanin. *Tyr*: Tyrosinase, *th*: Tyrosine hydroxylase. (e) DNA sequence alignments for the wild-caught Japonés, Piedras and Yerbaniz fishes showing the deletion of IRF2 binding site. (f) Expression levels of genes belonging to tyrosine metabolism downstream to *Hpdb*, measured in the livers of adult surface, Pachón and Tinaja. *Hgd*: Homogentisate 1,2- dioxygenase, *Fah*: fumarylacetoacetate hydrolase. All bar graphs represent average values  $\pm$  s.d. from  $n=2$  biologically independent RNA-seq experiments. \* indicates  $p$  value  $<0.05$  and \*\* indicates  $p$  value  $<0.005$  using two-tailed student's  $t$ -test. (g) Western blots to validate antibodies against H3K4me3, H3K27ac, and H3K27me3. Anti-tubulin was used as loading control. Original uncropped blots are presented in Supplementary figure 7.



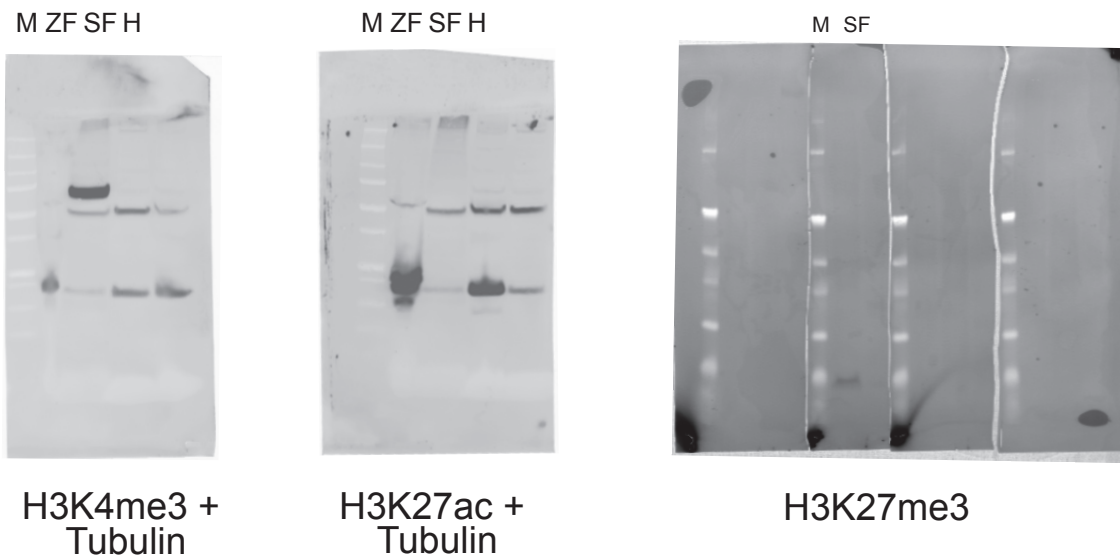

M - Marker; ZF - Zebrafish embryo extract;  
 SF - Surface fish embryo extract; H - Hela cell extract

**Supplementary Figure 7:** Original uncropped images for Western blots showed in Supplementary Figure 6g.

**Supplementary Table 1– *Astyanax* CREs overlap with human liver enhancers**

This Excel sheet provides gerp loci that are orthologous to mapped CREs in the study. The coordinates are in Astmex 1 genome.

gerp = Genomic Evolutionary Rate Profiling

gerp coordinates are loci that are conserved between human and *Astyanax*.

Atac.width – width of the ATAC-seq peak.

**Supplementary Table 2 – Candidates for functional assay**

Coordinates and nearest gene descriptions of the CREs tested in the cell lines.

**Supplementary Table 3 – Sequencing QC**

The Excel sheet provides quality control data for all the genomics experiments

**Supplementary Table 4 – List of primers**

List of primers and oligos used in the study

Supplementary Table 1

| gerp.chr | gerp.start | gerp.end | atac.chr | atac.start | atac.end | atac.peak.na | atac.width |
|----------|------------|----------|----------|------------|----------|--------------|------------|
| KB882187 | 313632     | 313634   | KB882187 | 313052     | 313837   | ATAC_69725   | 786        |
| KB882187 | 313631     | 313632   | KB882187 | 313052     | 313837   | ATAC_69725   | 786        |
| KB882187 | 313519     | 313631   | KB882187 | 313052     | 313837   | ATAC_69725   | 786        |
| KB882179 | 2033362    | 2033571  | KB882179 | 2032949    | 2033987  | ATAC_68604   | 1039       |
| KB882179 | 2033576    | 2033587  | KB882179 | 2032949    | 2033987  | ATAC_68604   | 1039       |
| KB882179 | 2038158    | 2038175  | KB882179 | 2038077    | 2038467  | ATAC_68606   | 391        |
| KB882179 | 2038175    | 2038179  | KB882179 | 2038077    | 2038467  | ATAC_68606   | 391        |
| KB882179 | 2038182    | 2038189  | KB882179 | 2038077    | 2038467  | ATAC_68606   | 391        |
| KB882179 | 2038189    | 2038195  | KB882179 | 2038077    | 2038467  | ATAC_68606   | 391        |
| KB882179 | 2038211    | 2038212  | KB882179 | 2038077    | 2038467  | ATAC_68606   | 391        |
| KB882179 | 2038212    | 2038223  | KB882179 | 2038077    | 2038467  | ATAC_68606   | 391        |
| KB882179 | 2038223    | 2038282  | KB882179 | 2038077    | 2038467  | ATAC_68606   | 391        |
| KB882179 | 2038282    | 2038348  | KB882179 | 2038077    | 2038467  | ATAC_68606   | 391        |
| KB872048 | 43374      | 43466    | KB872048 | 42981      | 44063    | ATAC_28460   | 1083       |
| KB872048 | 43360      | 43363    | KB872048 | 42981      | 44063    | ATAC_28460   | 1083       |
| KB872048 | 43292      | 43316    | KB872048 | 42981      | 44063    | ATAC_28460   | 1083       |
| KB872048 | 43234      | 43288    | KB872048 | 42981      | 44063    | ATAC_28460   | 1083       |
| KB872048 | 43186      | 43231    | KB872048 | 42981      | 44063    | ATAC_28460   | 1083       |
| KB871615 | 752068     | 752069   | KB871615 | 751613     | 752512   | ATAC_5049    | 900        |
| KB882276 | 471611     | 471614   | KB882276 | 471124     | 472444   | ATAC_82490   | 1321       |
| KB882279 | 1103427    | 1103475  | KB882279 | 1103382    | 1104071  | ATAC_82891   | 690        |
| KB872295 | 340588     | 340603   | KB872295 | 339441     | 340861   | ATAC_34119   | 1421       |
| KB882146 | 1860708    | 1860709  | KB882146 | 1859547    | 1861894  | ATAC_62181   | 2348       |
| KB882173 | 1560183    | 1560184  | KB882173 | 1560067    | 1560772  | ATAC_67477   | 706        |
| KB872043 | 47412      | 47415    | KB872043 | 46789      | 47491    | ATAC_28357   | 703        |
| KB871633 | 1305786    | 1305800  | KB871633 | 1305630    | 1306221  | ATAC_6879    | 592        |
| KB871601 | 499967     | 499973   | KB871601 | 499828     | 500316   | ATAC_3747    | 489        |
| KB871586 | 685        | 687      | KB871586 | 365        | 993      | ATAC_2282    | 629        |
| KB872367 | 13027      | 13036    | KB872367 | 12401      | 13906    | ATAC_35721   | 1506       |
| KB882267 | 1090697    | 1090708  | KB882267 | 1089722    | 1090923  | ATAC_81144   | 1202       |
| KB882230 | 1341923    | 1341924  | KB882230 | 1341693    | 1343132  | ATAC_76424   | 1440       |
| KB872081 | 2322129    | 2322148  | KB872081 | 2321050    | 2322357  | ATAC_29500   | 1308       |
| KB871615 | 691535     | 691543   | KB871615 | 691158     | 692379   | ATAC_5041    | 1222       |
| KB882177 | 653613     | 653614   | KB882177 | 653371     | 655098   | ATAC_68132   | 1728       |
| KB882193 | 1501882    | 1501887  | KB882193 | 1501407    | 1503644  | ATAC_70718   | 2238       |
| KB871938 | 4185456    | 4185460  | KB871938 | 4184948    | 4185880  | ATAC_24857   | 933        |
| KB871668 | 12493      | 12507    | KB871668 | 12350      | 13316    | ATAC_9428    | 967        |
| KB882184 | 1149742    | 1149769  | KB882184 | 1148858    | 1149784  | ATAC_69306   | 927        |
| KB882227 | 496453     | 496454   | KB882227 | 495978     | 498188   | ATAC_75929   | 2211       |
| KB882224 | 961535     | 961649   | KB882224 | 960807     | 961682   | ATAC_75567   | 876        |
| KB882083 | 1161942    | 1161947  | KB882083 | 1160582    | 1162333  | ATAC_44963   | 1752       |
| KB882231 | 1569399    | 1569403  | KB882231 | 1568376    | 1569795  | ATAC_76569   | 1420       |
| KB882202 | 143136     | 143137   | KB882202 | 141406     | 143509   | ATAC_71980   | 2104       |
| KB882209 | 1761892    | 1761893  | KB882209 | 1761393    | 1762393  | ATAC_73509   | 1001       |

Supplementary Table 1 continued

|          |         |         |          |         |         |            |      |
|----------|---------|---------|----------|---------|---------|------------|------|
| KB871668 | 12439   | 12440   | KB871668 | 12350   | 13316   | ATAC_9428  | 967  |
| KB882196 | 940187  | 940188  | KB882196 | 938697  | 940382  | ATAC_71132 | 1686 |
| KB882089 | 2009829 | 2009839 | KB882089 | 2009175 | 2010194 | ATAC_47048 | 1020 |
| KB882118 | 2670309 | 2670337 | KB882118 | 2669855 | 2671426 | ATAC_55559 | 1572 |
| KB872059 | 29027   | 29028   | KB872059 | 28271   | 29834   | ATAC_28759 | 1564 |
| KB882105 | 3040799 | 3040804 | KB882105 | 3039975 | 3041007 | ATAC_51855 | 1033 |
| KB871747 | 600651  | 600656  | KB871747 | 599622  | 601264  | ATAC_14729 | 1643 |
| KB872013 | 377173  | 377293  | KB872013 | 376828  | 379207  | ATAC_27548 | 2380 |
| KB871663 | 614254  | 614259  | KB871663 | 614208  | 614993  | ATAC_9156  | 786  |
| KB882105 | 3040572 | 3040573 | KB882105 | 3039975 | 3041007 | ATAC_51855 | 1033 |
| KB882143 | 1681123 | 1681171 | KB882143 | 1680961 | 1682502 | ATAC_61224 | 1542 |
| KB872026 | 73840   | 73974   | KB872026 | 73714   | 74276   | ATAC_27876 | 563  |
| KB882312 | 105772  | 105857  | KB882312 | 105518  | 106441  | ATAC_86107 | 924  |
| KB882084 | 3846069 | 3846082 | KB882084 | 3845242 | 3846812 | ATAC_45517 | 1571 |
| KB872498 | 47664   | 47665   | KB872498 | 47049   | 47877   | ATAC_37042 | 829  |
| KB882179 | 2038348 | 2038351 | KB882179 | 2038077 | 2038467 | ATAC_68606 | 391  |
| KB882251 | 1492967 | 1492973 | KB882251 | 1492743 | 1493331 | ATAC_79288 | 589  |
| KB882297 | 1028781 | 1028791 | KB882297 | 1028464 | 1029811 | ATAC_84755 | 1348 |
| KB871630 | 5460928 | 5460936 | KB871630 | 5460558 | 5461241 | ATAC_6588  | 684  |
| KB882090 | 3841535 | 3841560 | KB882090 | 3840822 | 3841997 | ATAC_47466 | 1176 |
| KB882273 | 73107   | 73109   | KB882273 | 71950   | 73268   | ATAC_82060 | 1319 |
| KB882163 | 2426620 | 2426629 | KB882163 | 2426028 | 2426742 | ATAC_65513 | 715  |
| KB871864 | 38321   | 38322   | KB871864 | 37848   | 39277   | ATAC_21607 | 1430 |
| KB882187 | 1271242 | 1271248 | KB882187 | 1270372 | 1271253 | ATAC_69779 | 882  |
| KB872048 | 158399  | 158400  | KB872048 | 158318  | 159081  | ATAC_28467 | 764  |
| KB882297 | 1028781 | 1028791 | KB882297 | 1028464 | 1029811 | ATAC_84755 | 1348 |
| KB882088 | 3752756 | 3752843 | KB882088 | 3752561 | 3752848 | ATAC_46855 | 288  |
| KB871592 | 56235   | 56264   | KB871592 | 54711   | 56558   | ATAC_2846  | 1848 |
| KB882244 | 1087369 | 1087376 | KB882244 | 1087075 | 1087655 | ATAC_78458 | 581  |
| KB872029 | 225035  | 225047  | KB872029 | 223050  | 225047  | ATAC_28005 | 1998 |
| KB882124 | 2392205 | 2392213 | KB882124 | 2391697 | 2393457 | ATAC_57043 | 1761 |
| KB871793 | 430097  | 430112  | KB871793 | 429344  | 430376  | ATAC_17877 | 1033 |
| KB882179 | 2018181 | 2018183 | KB882179 | 2017387 | 2018390 | ATAC_68603 | 1004 |
| KB882214 | 880297  | 880306  | KB882214 | 879843  | 880966  | ATAC_74237 | 1124 |
| KB882147 | 1666068 | 1666251 | KB882147 | 1666036 | 1666332 | ATAC_62409 | 297  |
| KB882086 | 948618  | 948620  | KB882086 | 948571  | 950339  | ATAC_45956 | 1769 |
| KB882145 | 7044550 | 7044644 | KB882145 | 7043575 | 7044662 | ATAC_61964 | 1088 |
| KB882144 | 2411717 | 2411721 | KB882144 | 2411006 | 2411828 | ATAC_61485 | 823  |
| KB882199 | 920653  | 920724  | KB882199 | 918710  | 921288  | ATAC_71605 | 2579 |
| KB872164 | 77906   | 77908   | KB872164 | 77064   | 78604   | ATAC_31956 | 1541 |
| KB872273 | 83780   | 83781   | KB872273 | 83017   | 84229   | ATAC_33768 | 1213 |
| KB872082 | 893945  | 894052  | KB872082 | 892896  | 894968  | ATAC_29747 | 2073 |
| KB882106 | 4096705 | 4096706 | KB882106 | 4096326 | 4096864 | ATAC_52251 | 539  |
| KB882103 | 526032  | 526038  | KB882103 | 525864  | 527052  | ATAC_50800 | 1189 |
| KB878679 | 1206    | 1215    | KB878679 | 345     | 1287    | ATAC_43261 | 943  |

Supplementary Table 1 continued

|          |         |         |          |         |         |            |      |
|----------|---------|---------|----------|---------|---------|------------|------|
| KB882105 | 2031704 | 2031730 | KB882105 | 2031704 | 2032036 | ATAC_51778 | 333  |
| KB882205 | 1730478 | 1730486 | KB882205 | 1729904 | 1732329 | ATAC_72843 | 2426 |
| KB882123 | 256671  | 256727  | KB882123 | 255944  | 257212  | ATAC_56589 | 1269 |
| KB882239 | 190010  | 190044  | KB882239 | 188912  | 190351  | ATAC_77708 | 1440 |
| KB873139 | 17211   | 17212   | KB873139 | 16289   | 18464   | ATAC_40593 | 2176 |
| KB871701 | 218352  | 218355  | KB871701 | 218079  | 218882  | ATAC_12045 | 804  |
| KB882126 | 212403  | 212408  | KB882126 | 211085  | 212603  | ATAC_57535 | 1519 |
| KB882104 | 2410846 | 2410860 | KB882104 | 2410420 | 2412079 | ATAC_51514 | 1660 |
| KB871797 | 471370  | 471371  | KB871797 | 470450  | 471475  | ATAC_18074 | 1026 |
| KB872982 | 34064   | 34068   | KB872982 | 33677   | 34663   | ATAC_40202 | 987  |
| KB882270 | 3568717 | 3568719 | KB882270 | 3567048 | 3568913 | ATAC_81656 | 1866 |
| KB872818 | 1703244 | 1703246 | KB872818 | 1702156 | 1703644 | ATAC_39119 | 1489 |
| KB872164 | 77906   | 77908   | KB872164 | 77064   | 78604   | ATAC_31956 | 1541 |
| KB872498 | 47664   | 47665   | KB872498 | 47049   | 47877   | ATAC_37042 | 829  |
| KB882303 | 319973  | 320089  | KB882303 | 319163  | 320200  | ATAC_85296 | 1038 |
| KB882260 | 194342  | 194344  | KB882260 | 193953  | 194589  | ATAC_80223 | 637  |
| KB882106 | 207799  | 207803  | KB882106 | 207578  | 208449  | ATAC_51931 | 872  |
| KB882150 | 73565   | 73566   | KB882150 | 73149   | 73796   | ATAC_62900 | 648  |
| KB882210 | 1378232 | 1378237 | KB882210 | 1377600 | 1378282 | ATAC_73629 | 683  |
| KB882233 | 5739030 | 5739035 | KB882233 | 5738623 | 5739879 | ATAC_77074 | 1257 |
| KB872615 | 9820    | 9821    | KB872615 | 8792    | 10238   | ATAC_37921 | 1447 |
| KB871578 | 4360234 | 4360241 | KB871578 | 4359184 | 4361413 | ATAC_283   | 2230 |
| KB872081 | 2322129 | 2322148 | KB872081 | 2321050 | 2322357 | ATAC_29500 | 1308 |
| KB872029 | 225035  | 225047  | KB872029 | 223050  | 225047  | ATAC_28005 | 1998 |
| KB871764 | 63753   | 63754   | KB871764 | 63089   | 64448   | ATAC_16284 | 1360 |
| KB882106 | 282881  | 282885  | KB882106 | 282563  | 283630  | ATAC_51941 | 1068 |
| KB882113 | 1867165 | 1867170 | KB882113 | 1865837 | 1867371 | ATAC_54073 | 1535 |

## Supplementary Table 2

| CRM number | coordinates                    | specificity      | nearest.gene       | gene description                                             |
|------------|--------------------------------|------------------|--------------------|--------------------------------------------------------------|
| CRM_1      | APWO02000126.1:12116-12322     | Cave-specific    | ENSAMXG00000021129 | inositol polyphosphate 5-phosphatase K-like                  |
| CRM_2      | 5:20862951-20863249            | Surface-specific | ENSAMXG00000017885 | Transducin like enhancer of split 2b                         |
| CRM_3      | APWO02000046.1:5908919-5909487 | Surface-specific | ENSAMXG00000018939 | Cytochrome P450, family 2, subfamily K, polypeptide 8        |
| CRM_4      | APWO02002143.1:13670-13963     | Cave-specific    | ENSAMXG00000000698 | protein phosphatase 1H-like [Source:NCBI gene;Acc:103035555] |
| CRM_5      | 11:11176042-11175510           | Surface-specific | ENSAMXG00000004148 | Hydroxypyruvate reductase (GRHPR)                            |
| CRM_6      | APWO02001323.1:49828-50218     | Cave-specific    | ENSAMXG00000001621 | -                                                            |
| CRM_7      | APWO02000055.1:404521-404568   | Surface-specific | ENSAMXG00000018424 | kinesin family member 9                                      |
| CRM_8      | APWO02000139.1:4691964-4692266 | Surface-specific | ENSAMXG00000008187 | prostaglandin E2 receptor EP4 subtype                        |
| CRM_9      | APWO02002377.1:5952-6319       | Cave-specific    | ENSAMXG00000016306 | calcium/calmodulin-dependent protein kinase type 1D-like     |
| CRM_10     | 18:7017570-7017917             | Surface-specific | ENSAMXG00000003688 | deoxyribodipyrimidine photo-lyase-like                       |
| CRM_11     | 9:36562402-36562882            | Surface-specific | ENSAMXG00000018617 | iodothyronine deiodinase 2                                   |
| CRM_12     | 13:36360727-36361987           | Cave-specific    | ENSAMXG00000001899 | 6-phosphofructo-2-kinase/fructose-2,6-bisphosphatase 4-like  |
| CRM_13     | 5:8790638-8791408              | Surface-specific | ENSAMXG00000008063 | Fetuin B                                                     |
| CRM_14     | 8:5530266-5530674              | Cave-specific    | ENSAMXG00000018872 | glutathione S-transferase pi 2                               |
| CRM_15     | 6:33370826-33370935            | Cave-specific    | ENSAMXG00000015502 | 4-hydroxyphenylpyruvate dioxygenase                          |
| CRM_16     | 18:17152529-17153211           | Surface-specific | ENSAMXG00000003000 | mitogen-activated protein kinase kinase 1                    |
| CRM_17     | 7:9582583-9583260              | Cave-specific    | ENSAMXG00000008354 | slc47a3 Multidrug and toxin extrusion protein 1-like         |
| CRM_18     | 7:24261100-24262368            | Surface-specific | ENSAMXG00000019808 | solute carrier family 16 member 7                            |
| CRM_19     | 20:10902951-10903397           | Cave-specific    | ENSAMXG00000016875 | sodium/nucleoside cotransporter 2                            |
| CRM_20     | APWO02000037.1:3462546-3463098 | Cave-specific    | ENSAMXG00000016393 | squalene epoxidase                                           |
| CRM_21     | 25:21808992-21810214           | Surface-specific | ENSAMXG00000001966 | apoptosis inducing factor, mitochondria associated 2         |
| CRM_22     | 6:7155483-7156454              | Surface-specific | ENSAMXG00000007498 | synaptophysin a                                              |
| CRM_23     | 17:3671345-3672232             | Surface-specific | ENSAMXG00000012893 | phosphotriesterase related                                   |
| CRM_24     | 19:161341-162334               | Surface-specific | ENSAMXG00000009850 | nitric oxide synthase trafficking                            |
| CRM_25     | 6:33372486-33373251            | Cave-specific    | ENSAMXG00000015502 | 4-hydroxyphenylpyruvate dioxygenase                          |

Supplementary Table 3

| QC data for ChIP-seq, ATAC-seq and RNA-seq |            |          |             |                |                |              |              |                    |                    |                      |           |                         |
|--------------------------------------------|------------|----------|-------------|----------------|----------------|--------------|--------------|--------------------|--------------------|----------------------|-----------|-------------------------|
| Sample name in Original data               | Morphotype | Feature  | Total reads | Unmapped reads | Unmapped reads | mapped reads | mapped reads | Multimappe d reads | Multimappe d reads | % Total mapped reads | Replicate |                         |
| s_sf3k27ac1                                | Surface    | H3K27ac  | 28896164    | 4212313        | 14.58          | 19549051     | 67.65        | 5134800            | 17.77              | 85.42                | 1         |                         |
| s_sf3k27ac2                                | Surface    | H3K27ac  | 29287690    | 4169598        | 14.24          | 19908604     | 67.98        | 5209488            | 17.79              | 85.76                | 2         |                         |
| s_sf3k4me31                                | Surface    | H3K4me3  | 28284936    | 4484867        | 15.86          | 17396700     | 61.51        | 6403369            | 22.64              | 84.14                | 1         |                         |
| s_sf3k4me32                                | Surface    | H3K4me3  | 29097834    | 4530128        | 15.57          | 18118761     | 62.27        | 6448945            | 22.16              | 84.43                | 2         |                         |
| s_surface_k27me3_a                         | Surface    | H3K27me3 | 13313897    | 2786856        | 20.93          | 6895151      | 51.79        | 3631890            | 27.28              | 79.07                | 1         |                         |
| s_surface_k27me3_b                         | Surface    | H3K27me3 | 13486379    | 2801383        | 20.77          | 7061718      | 52.36        | 3623278            | 26.87              | 79.23                | 2         |                         |
| s_surface_1                                | Surface    | ATAC     | 39327874    | 8349780        | 21.23          | 28359185     | 72.11        | 2618909            | 6.66               | 84.81                | 1         |                         |
| s_surface_2                                | Surface    | ATAC     | 60873891    | 13205999       | 21.69          | 43494926     | 71.45        | 4172966            | 6.86               | 84.68                | 2         |                         |
| s_sfinput                                  | Surface    | Input    | 30572883    | 4952270        | 16.2           | 17817175     | 58.28        | 7803438            | 25.52              | 83.8                 | 1         | Input for ChIP samples  |
| s_surface_input                            | Surface    | Input    | 27355910    | 4351054        | 15.91          | 16049710     | 58.67        | 6955146            | 25.42              | 84.09                | 2         | Input for H3K27me3 ChIP |
|                                            |            |          |             |                |                |              |              |                    |                    |                      |           |                         |
| s_h3k27ac_1ug                              | Pachón     | H3K27ac  | 27833853    | 3116030        | 11.2           | 19555813     | 70.26        | 5162010            | 18.55              | 88.8                 | 1         |                         |
| s_pachon_h3k27ac_1ug_b                     | Pachón     | H3K27ac  | 30838536    | 4748285        | 15.4           | 20738671     | 67.25        | 5351580            | 17.35              | 84.6                 | 2         |                         |
| s_h3k4me3_1ug                              | Pachón     | H3K4me3  | 29602992    | 4482011        | 15.14          | 18170864     | 61.38        | 6950117            | 23.48              | 84.86                | 1         |                         |
| s_pachon_h3k4me3_1ug_b                     | Pachón     | H3K4me3  | 32384913    | 5065249        | 15.64          | 19876454     | 61.38        | 7443210            | 22.98              | 84.36                | 2         |                         |
| s_pachon_k27me3_a                          | Pachón     | H3K27me3 | 14649941    | 2825828        | 19.29          | 7736917      | 52.81        | 4087196            | 27.9               | 80.71                | 1         |                         |
| s_pachon_k27me3_b                          | Pachón     | H3K27me3 | 15782262    | 2994775        | 18.98          | 8285425      | 52.5         | 4502062            | 28.53              | 81.02                | 2         |                         |
| s_pachon_1                                 | Pachón     | ATAC     | 52080524    | 8550858        | 16.42          | 40290056     | 77.36        | 3239610            | 6.22               | 88.52                | 1         |                         |
| s_pachon_2                                 | Pachón     | ATAC     | 47791467    | 8365804        | 17.5           | 36915377     | 77.24        | 2510286            | 5.25               | 88.94                | 2         |                         |
| s_pachon_input                             | Pachón     | Input    | 59420483    | 7780710        | 13.09          | 35856259     | 60.34        | 15783514           | 26.56              | 86.91                | 1         | Input for ChIP samples  |
| s_pachon_input                             | Pachón     | Input    | 29918122    | 4159031        | 13.9           | 18022556     | 60.24        | 7736535            | 25.86              | 86.1                 | 2         | Input for H3K27me3 ChIP |
|                                            |            |          |             |                |                |              |              |                    |                    |                      |           |                         |
| s_tinajak27aca                             | Tinaja     | H3K27ac  | 45553054    | 7038172        | 15.45          | 30352992     | 66.63        | 8161890            | 17.92              | 84.55                | 1         |                         |
| s_tinajak27acb                             | Tinaja     | H3K27ac  | 43342684    | 7500452        | 17.31          | 28276411     | 65.24        | 7565821            | 17.46              | 82.69                | 2         |                         |
| s_tinaja_h3k27ac_b                         | Tinaja     | H3K27ac  | 31221992    | 4193820        | 13.43          | 21053814     | 67.43        | 5974358            | 19.14              | 86.57                | 3         |                         |
| s_tinajak4me3a                             | Tinaja     | H3K4me3  | 49635852    | 8129866        | 16.38          | 31500926     | 63.46        | 10005060           | 20.16              | 83.62                | 1         |                         |
| s_tinajak4me3b                             | Tinaja     | H3K4me3  | 49633221    | 8305438        | 16.73          | 31648424     | 63.76        | 9679359            | 19.5               | 83.27                | 2         |                         |
| s_tinaja_h3k4me3_a                         | Tinaja     | H3K4me3  | 35138318    | 5499463        | 15.65          | 21916095     | 62.37        | 7722760            | 21.98              | 84.35                | 3         |                         |
| s_tinaja_k27me3_a                          | Tinaja     | H3K27me3 | 17427245    | 3429257        | 19.68          | 8960936      | 51.42        | 5037052            | 28.9               | 80.32                | 1         |                         |
| s_tinaja_k27me3_b                          | Tinaja     | H3K27me3 | 15064770    | 3072767        | 20.4           | 7784172      | 51.67        | 4207831            | 27.93              | 79.6                 | 2         |                         |
| s_tinaja_1                                 | Tinaja     | ATAC     | 57278843    | 12360989       | 21.58          | 40782123     | 71.2         | 4135731            | 7.22               | 84.31                | 1         |                         |
| s_tinaja_2                                 | Tinaja     | ATAC     | 53957916    | 11929952       | 22.11          | 38304678     | 70.99        | 3723286            | 6.9                | 84.35                | 2         |                         |
| s_tinaja_input                             | Tinaja     | Input    | 39893215    | 5891832        | 14.77          | 23582776     | 59.11        | 10418607           | 26.12              | 85.23                | 1         | Input for ChIP samples  |
| s_tinaja_input                             | Tinaja     | Input    | 29127120    | 4450498        | 15.28          | 17136677     | 58.83        | 7539945            | 25.89              | 84.72                | 2         | Input for H3K27me3 ChIP |

Supplementary Table 3 continued

| MACS2 QC   |                                  |              |
|------------|----------------------------------|--------------|
| Morphotype | Chromatin feature/<br>Experiment | No. of peaks |
| Surface    | H3K27ac                          | 70089        |
| Surface    | H3K4me3                          | 56323        |
| Surface    | H3K27me3                         | 97948        |
| Surface    | ATAC                             | 73675        |
| Pachón     | H3K27ac                          | 93527        |
| Pachón     | H3K4me3                          | 64432        |
| Pachón     | H3K27me3                         | 98198        |
| Pachón     | ATAC                             | 72521        |
| Tinaja     | H3K27ac                          | 117125       |
| Tinaja     | H3K4me3                          | 136219       |
| Tinaja     | H3K27me3                         | 99370        |
| Tinaja     | ATAC                             | 84653        |



Supplementary Table 4

| S.No. | Primers                  | Sequence                                   | product size | Use                                                      |
|-------|--------------------------|--------------------------------------------|--------------|----------------------------------------------------------|
| 1     | CRM_1F                   | GGGGAGACAAAAGTCTCCTAGC                     | 847bp        | Amplifying candidate regions from <i>Astyanax</i> genome |
| 2     | CRM_1R                   | GCATGACGGCATTGCAAAC                        |              | Amplifying candidate regions from <i>Astyanax</i> genome |
| 3     | CRM_2F                   | TTTAAATAAACAGAGACTGAGTGAC                  | 456bp        | Amplifying candidate regions from <i>Astyanax</i> genome |
| 4     | CRM_2R                   | GTTTGTAGTGTATGTGTAATGCC                    |              | Amplifying candidate regions from <i>Astyanax</i> genome |
| 5     | CRM_3F                   | CTCCCTCTCCCCAGCTAG                         | 1204bp       | Amplifying candidate regions from <i>Astyanax</i> genome |
| 6     | CRM_3R                   | GGTTGAAGCTTTTGGGCG                         |              | Amplifying candidate regions from <i>Astyanax</i> genome |
| 7     | CRM_4F                   | AGCTAAAGGGGTTTTGATC                        | 353bp        | Amplifying candidate regions from <i>Astyanax</i> genome |
| 8     | CRM_4R                   | GGCAATACCTACTGTTTCTG                       |              | Amplifying candidate regions from <i>Astyanax</i> genome |
| 9     | CRM_5F                   | CTATGTCTCACAGTTCAGCAG                      | 570bp        | Amplifying candidate regions from <i>Astyanax</i> genome |
| 10    | CRM_5R                   | ACCCAGAACAGTATCTCCAAG                      |              | Amplifying candidate regions from <i>Astyanax</i> genome |
| 11    | CRM_6F                   | TCTATTTTCATGCCTTCCG                        | 1042bp       | Amplifying candidate regions from <i>Astyanax</i> genome |
| 12    | CRM_6R                   | TTTATGCAAGGGTTCACAATTC                     |              | Amplifying candidate regions from <i>Astyanax</i> genome |
| 13    | CRM_7F                   | AACATGCTCTCTGCGTAGG                        | 853bp        | Amplifying candidate regions from <i>Astyanax</i> genome |
| 14    | CRM_7R                   | CCACAGTTTTCCACTGCAAAG                      |              | Amplifying candidate regions from <i>Astyanax</i> genome |
| 15    | CRM_8F                   | TCCTGCAATCTCCAACAAAC                       | 320bp        | Amplifying candidate regions from <i>Astyanax</i> genome |
| 16    | CRM_8R                   | TATTGTCCCTGTTCCAGAG                        |              | Amplifying candidate regions from <i>Astyanax</i> genome |
| 17    | CRM_9F                   | AGGTGGTGTAACTACTACAAAAG                    | 804bp        | Amplifying candidate regions from <i>Astyanax</i> genome |
| 18    | CRM_9R                   | GCTCCACCTACTGTTCCC                         |              | Amplifying candidate regions from <i>Astyanax</i> genome |
| 19    | CRM_10F                  | GTGTGTGTTCTTAAGTITTTG                      | 772bp        | Amplifying candidate regions from <i>Astyanax</i> genome |
| 20    | CRM_10R                  | TCCATGTCTACTATGCC                          |              | Amplifying candidate regions from <i>Astyanax</i> genome |
| 21    | CRM_18F                  | TGCAGGGTGTACAATAGGGC                       | 1331bp       | Amplifying candidate regions from <i>Astyanax</i> genome |
| 22    | CRM_18R                  | TACAACAGTGCAACCAGGCA                       |              | Amplifying candidate regions from <i>Astyanax</i> genome |
| 23    | CRM_12F                  | ACACAGAGCTCCTGTTGTCG                       | 2043bp       | Amplifying candidate regions from <i>Astyanax</i> genome |
| 24    | CRM_12R                  | GCTACTGGTGATCCCACACC                       |              | Amplifying candidate regions from <i>Astyanax</i> genome |
| 25    | CRM_14F                  | AACAGACCGTTCATGCTGGA                       | 1216bp       | Amplifying candidate regions from <i>Astyanax</i> genome |
| 26    | CRM_14R                  | AAATTACCCAGGACCCCT                         |              | Amplifying candidate regions from <i>Astyanax</i> genome |
| 27    | CRM_11F                  | CAGGTCCTGTTTTGAGGGGTT                      | 1668bp       | Amplifying candidate regions from <i>Astyanax</i> genome |
| 28    | CRM_11R                  | TGCCCTATCCAAAGGGAAC                        |              | Amplifying candidate regions from <i>Astyanax</i> genome |
| 29    | CRM_15F                  | AGTGAGCGGATGGTGTTCCAG                      | 1002bp       | Amplifying candidate regions from <i>Astyanax</i> genome |
| 30    | CRM_15R                  | TCCATACGGGAACCTAATGCC                      |              | Amplifying candidate regions from <i>Astyanax</i> genome |
| 31    | CRM_17F                  | GCACTTACAGGCCAACAGC                        | 1400bp       | Amplifying candidate regions from <i>Astyanax</i> genome |
| 32    | CRM_17R                  | TCACCTGTGATCACCAACAGT                      |              | Amplifying candidate regions from <i>Astyanax</i> genome |
| 33    | CRM_21F                  | CCACTGGGAACCTTGCACTGT                      | 2269bp       | Amplifying candidate regions from <i>Astyanax</i> genome |
| 34    | CRM_21R                  | GGCACTTTGATTTGGTGGGG                       |              | Amplifying candidate regions from <i>Astyanax</i> genome |
| 35    | CRM_19F                  | AAGCTCCACTGCTGATTCGC                       | 1431bp       | Amplifying candidate regions from <i>Astyanax</i> genome |
| 36    | CRM_19R                  | TTTGAGGGATAGAGTCATTAACCA                   |              | Amplifying candidate regions from <i>Astyanax</i> genome |
| 37    | CRM_16F                  | GCACAAATCTACATCCTGGCA                      | 1565bp       | Amplifying candidate regions from <i>Astyanax</i> genome |
| 38    | CRM_16R                  | GAGTGTCTTTGGGCCGTTA                        |              | Amplifying candidate regions from <i>Astyanax</i> genome |
| 39    | CRM_13F                  | TACACAGCGCAATGGAACA                        | 2009bp       | Amplifying candidate regions from <i>Astyanax</i> genome |
| 40    | CRM_13R                  | GCCAATGGCAACAGACTGAAC                      |              | Amplifying candidate regions from <i>Astyanax</i> genome |
| 41    | CRM_20F                  | AGATGGAAGCGTCAGCAGTC                       | 1359bp       | Amplifying candidate regions from <i>Astyanax</i> genome |
| 42    | CRM_20R                  | TCAACACGTGTGCGTTTAGC                       |              | Amplifying candidate regions from <i>Astyanax</i> genome |
| 43    | HLC-PCRtoPGL_gibsonF     | agctcgtagcctcgaggatGAGGATATCGAGCTCG        |              | Transferring candidate regions from fish reporter        |
| 44    | HLC-PCRtoPGL_gibsonR     | cgccgagggccagatcttgatAGGGTAATGAGGGCC       |              | vector to luciferase vector                              |
| 45    | cf_rpl13a_2F             | CGCAACAAATTGAAGTACCTG                      |              | qPCR housekeeping gene                                   |
| 46    | cf_rpl13a_2R             | GGTTCGTGTTTCATCCTCTTG                      |              | qPCR housekeeping gene                                   |
| 47    | PGL_SHPD2-del-F          | AAAAAACTGCAAGAAAAACAGCAATGCTAAAATGCATCTTAC |              | Gibson primer for mutating IRF2 binding site in          |
| 48    | PGL_SHPD2-del-R          | TGTTTTTCTTGCAGTTTTTTTTATGTTGTGCAG          |              | S_CRM_15 cloned in reporter vector                       |
| 49    | S_Hpd2_del_F             | aaaaaCATTTCAGTTCAATGC                      |              | Oligo for EMSA                                           |
| 50    | S_Hpd2_del_R             | GCATTGAACTGAAAATGTTTT                      |              | Oligo for EMSA                                           |
| 53    | P_Hpd2_del20_F           | AGAAAAACATGCAAGCTAAA                       |              | Oligo for EMSA                                           |
| 54    | P_Hpd2_del20_R           | TTTAGCTTGCATGTTTTTCT                       |              | Oligo for EMSA                                           |
| 55    | PGL_PHPD2-undel-F        | aaaaaCATTTCAGTTCAATGCTAAAATGCATCTTACCAT    |              | Gibson primer for adding IRF2 binding site in            |
| 56    | PGL_PHPD2-undel-R        | ATTGAACTGAAAATGTTTTctgcagttttttatgtgtg     |              | C_CRM_15 cloned in reporter vector                       |
| 57    | Hpdb_mRNA_F1             | GAAAGAGGTGCCATCGTTGT                       |              | qPCR                                                     |
| 58    | Hpdb_mRNA_R2             | CTCCCTCTCCACCAGAGTG                        |              | qPCR                                                     |
| 59    | Hpdb_mRNA_F2             | CACATTGCCATGAACACCTC                       |              | qPCR                                                     |
| 60    | Hpdb_mRNA_R2             | CCTCCAGAATGCTGATGTCC                       |              | qPCR                                                     |
| 61    | Hpdb_allele_genRegion_F1 | GGAATACAGTGGGCGTGTCC                       |              | Genotyping                                               |
| 62    | Hpdb_allele_genRegion_R1 | AAATCTGAAGGAGCGTGCCA                       |              | Genotyping                                               |
| 63    | Hpdb_allele_genRegion_F2 | TGTCTGGACTGGTTTTGGTG                       |              | Genotyping                                               |
| 64    | Hpdb_allele_genRegion_R2 | GCACATTGCCATGAACACCT                       |              | Genotyping                                               |
| 65    | pGL4.23_RV3              | TAGCAAAATAGGCTGTCCCC                       |              | Sequencing of pGL4.23 vectors                            |
| 66    | pUC57-to-pGL-F           | gagctcgtagcctcgaggacCTCGCAATGCATCTAGAT     |              | For transferring candidate regions cloned in pUC57 to    |
| 67    | pUC57-to-pGL-R           | gccgagggccagatcttgataCGACGGGCCCCGGGATCCG   |              | luciferase vector                                        |

## 1. S-CRM\_15

## 2. P-CRM\_15

|   |     |                                                                          |     |
|---|-----|--------------------------------------------------------------------------|-----|
| 1 | 1   | AGTGAGCGGATGGTGTTCAGTGGCTGAATCTTTGATACCTCCACCCCTCATGAGAACCAATAGTATCCTT   | 70  |
| 2 | 1   | AGTGAGCGGATGGTGTTCAGTGGCTGAATCTTTGATACCTCCACCCCTCATGAGAACCAATAGCATCCTT   | 70  |
| 1 | 71  | TTCTACAGAAACTCCTCTAAGGTTCAATGAGTTCACAGCAAAGATGAAGAACATAGGGATAACACTGTTT   | 140 |
| 2 | 71  | TTCTACAGAAACTCCTCTAAGGTTCAATGAGTTCACAGCAAAGATGAAGAACATAGGGATAACACTGTTT   | 140 |
| 1 | 141 | GCAGAAAACACATTAGAAAATAAGCTGACCTGTTTTGCATTTCCCACCCAGAAGGTGATGTGGTCAAAGC   | 210 |
| 2 | 141 | GCAGAAAACACATTAGAAAATAAGCTGACCTGTTTTGCATTTCCCACCCAGAAGGTGATGTGGTCAAAGC   | 210 |
| 1 | 211 | AGACGAACCTGCCATGTTTCATGCTGATGGAAGAAAATCGGGTAAATCATTTTTATATATAAAAATAAATAT | 280 |
| 2 | 211 | AGACGAACCTGCCCTGTTTCATGCTGATGGAAGAAAATCGGGTAAATCATTTTTATATATAAAAATAAATAT | 280 |
| 1 | 281 | ACTGAATACTCACTGCAATTGCTCAGATTTAAATGCAAAAATGTATATATAAAAAAGTTTGTTTTATATA   | 350 |
| 2 | 281 | ACTGAATACTCACTGCAATTGCTCAGATTTAAATGCAAAAATTTATATATAAAAAAGTTTGTTTTATATA   | 350 |
| 1 | 351 | TTTGTGTGTTGGCTTTTTTACATCCTATATTACTCTGTTATCTGTCAAAGGTATAATTATAAAGCATATT   | 420 |
| 2 | 351 | TTTGTGTGTTGGCTTTTTTACATCCTATATTACTCTGTTATCTGTCAAAGGTATAATTATAAAGCATATT   | 420 |
| 1 | 421 | ACTTTTCCTCAAAGACATTTACTACTAAGAGTAAAAGTGGTTCCTGAGTCACATACCTTTTTCACCTTTGT  | 490 |
| 2 | 421 | ACTTTTCCTCAAAGACATTTACTACTAAGAGTAAAAGTGGTTCCTGAGTCACATACCTTTTTCACCTTTGT  | 490 |

1 491 CTGTGTAAGTTGTCTAAAAAAAAAACAGAGAAAAACACTGTTTTTGTATTTCTTTTTTATATTTTTGAGTG 560  
2 491 CTGTGTAAGTTGTCTAAAAAAAAAACAGAGAAAAACACTGTTTTTGTATTTCTTTTTTATATTTTTGAGTG 560

TT

1 561 GAAGGTCATTAGCTTCAGATGCTTTTTTCATAAAAAAA TAAT AATAATAATAATAATATCTGCACAACATA 630  
2 561 GAAGGTCATTAGCTTCAGATGCTTTTTTCATAAAAAAA -AA AATAATAATAATAATATCTGCACAACATA 629

IRF2-del

1 631 AAAAAA ACTGCAAGAAAAACA TTTTCAGTTCAAT GCTAAAATGCATCTTACCATGCTGATGTTCTGCAGG 700  
2 630 AAAAAA ACTGCAAGAAAAACA - - - - - TGCAA - GCTAAAATGCATCTTACCATGCTGATGTTCTGCAGG 691

1 701 TCCTGTTTTGAGGGGTTTTGAGGCAGAATGTTGGTCCAACCAGAATTTAAAGAGCAAGAGAAGCTAGGGG 770  
2 692 TCCTGTTTTGAGGGGTTTTGAGGCAGAATGTTGGTCCAACCAGAATTTAAAGAGCAAGAGAAGCTAGGGG 761

1 771 GGCGTTTCCCCCTCCACCGGATGCATGCAGTATGCAGAACTTACCTCAAATTAATGCCTGGTCTGGAC 840  
2 762 GGCGTTTCCCCCTCCACCGGATGCATGCAGTATGCAGAACTTACCTCAAATTAATGCCTGGTCTGGAC 831

ATA

1 841 TGATGACAATTATCACAAA ACTAATGAGAG - - AGTTA TTGGCACCTAATTTGAAATAATAT - AAGTATAA 907  
2 832 TGATGACAATTATCACAAA ACTAATGAGAG ATAGTTT TTGGCACCTAATTTGAAATAATAT A AAGTATAA 901

1 908 TTGATCACAAATGCAATGGAATTTAAAAT C CACACACTAACAGGTTTCTTATGTGCAGCTGCATAATAGAC 977  
2 902 TTGATCACAAATGCAATGGAATTTAAAAT T CACACACTAACAGGTTTCTTATGTGCAGCTGCATAATAGAC 971

1 978 AT A ATACAAAAGGCATTAGGTT - CCGTATGGA 1008

2 972 AT - ATACAAAAGGCATTAGGTT C CCGTATGGA 1002
